# Supplementary material for: Co-deposition motif for constructing inverse opal photonic crystals with pH sensing
Source: Royal Society of Chemistry journal article supplement (doi:10.1039/c5ra08046k), 2015-01-01
Supplement: c5ra08046k1.pdf [file c5ra08046k1.pdf]

1

## Supporting Information

2 **Co-deposition Motif for Constructing Inverse Opal Photonic Crystals with pH**

3 **Sensing**

4

5 Zhaokun Yang, Dongjian Shi, Xiaodong Zhang, Huanhuan Liu, Mingqing Chen, and

6 Shirong Liu\*

7 The Key Laboratory of Food Colloids and Biotechnology, Ministry of Education,

8 School of Chemical and Material Engineering, Jiangnan University, Wuxi 214122,

9 P. R. China

10

11 Fig. S1 showed SEM image of PSA colloids. Fig. S2 presented the pH  
12 dependence of Bragg diffraction wavelength of IOH film with thicknesses of 50  $\mu\text{m}$   
13 in buffer solutions. Fig. S3 presented the pH dependence of Bragg diffraction  
14 wavelength of IOH film with thicknesses of 25  $\mu\text{m}$  in buffer solutions. Similar Bragg  
15 diffraction peak shifts as a function of the pH variation had been observed. As the pH  
16 increased from 2.67 to 8.43, the Bragg diffraction peak monotonically red shifted;  
17 whereupon it blue shifted with further pH increased.

18 Fig. S4 showed the pH responsive time of the IOH film with thicknesses of 50  
19  $\mu\text{m}$  upon soaking in solutions between pH 2.67 and pH 8.43. Fig. S5 showed the pH  
20 responsive time of the IOH film with thicknesses of 25  $\mu\text{m}$  upon soaking in solutions  
21 between pH 2.67 and pH 8.43. It can be clearly seen that the response process was  
22 complete within 10 s.

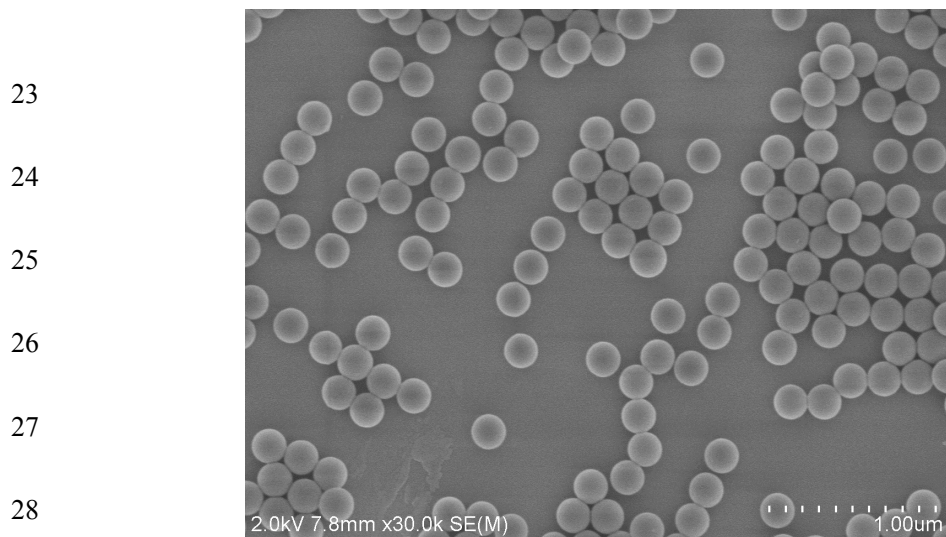

29 Fig. S1 SEM image of PSA colloids.

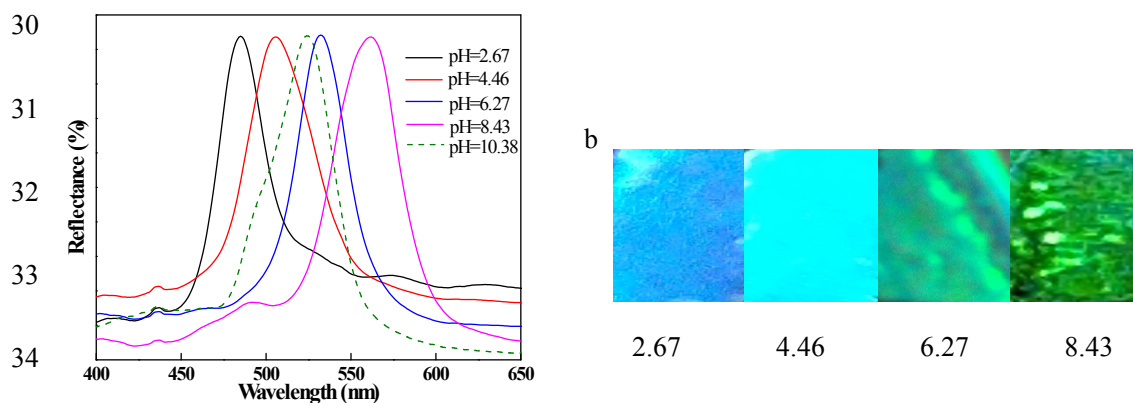

35 Fig. S2 (a) Optical response of IOH film upon soaking in buffer solutions at different  
36 pH values. (b) Photograph of IOH film under different pH conditions.

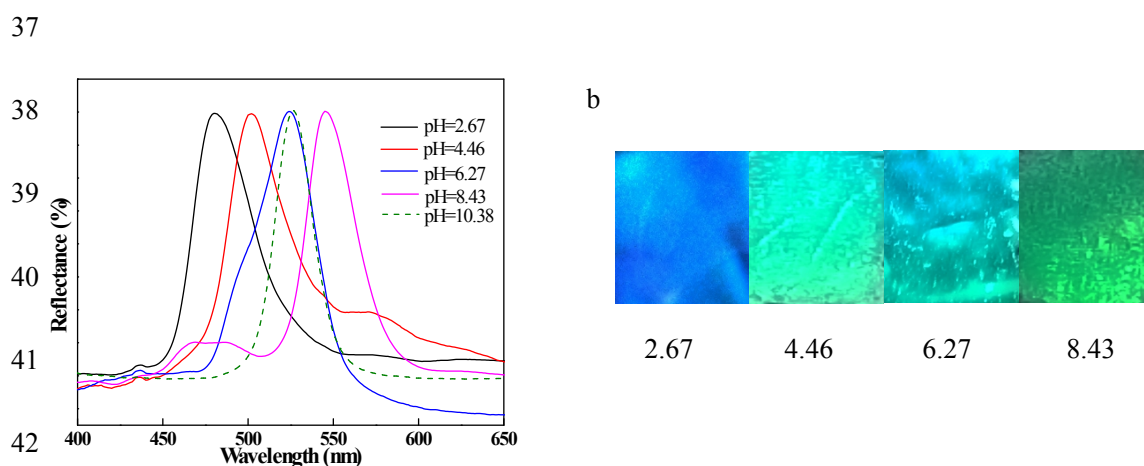

43 Fig. S3 (a) Optical response of IOH film upon soaking in buffer solutions at different  
44 pH values. (b) Photograph of IOH film under different pH conditions.

45  
46  
47  
48  
49

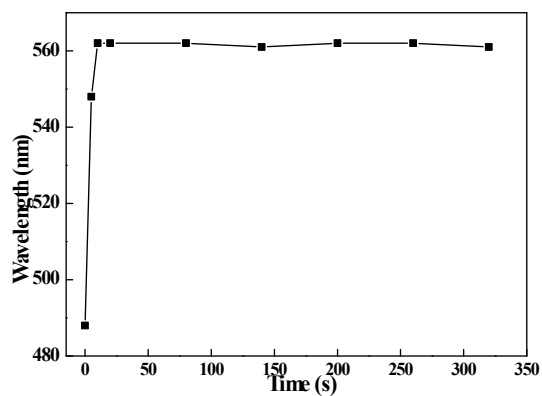

50 Fig. S4 Kinetic response of IOH film upon soaking in buffer solutions between pH  
51 2.67 and pH 8.43.

52  
53  
54  
55  
56

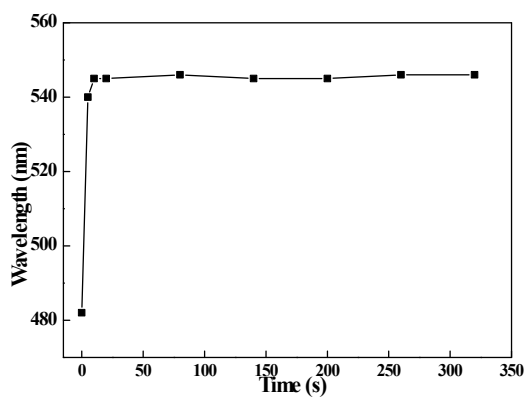

57 Fig. S5 Kinetic response of IOH film upon soaking in buffer solutions between pH  
58 2.67 and pH 8.43.
